# Supplementary material
Source: publisher figshare collection journal article supplement (https://acs.figshare.com/ndownloader/files/28676679)
Supplement: Supplementary file 1 [file 28676679]

## Supporting Information

### Alkali Metal Fluorides in Fluorinated Alcohols: Fundamental Properties and Applications to Electrochemical Fluorination

Naoki Shida,<sup>†,‡,\*</sup> Hiroaki Takenaka,<sup>†</sup> Akihiro Gotou,<sup>#</sup> Tomohiro Isogai,<sup>#</sup> Akiyoshi Yamauchi,<sup>#</sup> Yosuke Kishikawa,<sup>#</sup> Yuuya Nagata,<sup>¶</sup> Ikuyoshi Tomita,<sup>†</sup> Toshio Fuchigami,<sup>†</sup> Shinsuke Inagi<sup>†,§,\*</sup>

<sup>†</sup>Department of Chemical Science and Engineering, School of Materials and Chemical Technology, Tokyo Institute of Technology, 4259 Nagatsuta-cho, Midori-ku, Yokohama 226-8502, Japan

Tel: +81-45-924-5407, Fax: +81-45-924-5407

<sup>‡</sup>Department of Chemistry and Life Science, Yokohama National University, 79-5 Tokiwadai, Hodogaya-ku, Yokohama 240-8501, Japan

<sup>#</sup>Daikin Industries Ltd., 1-1 Nishi-Hitotsuya, Settsu, Osaka 566-8585, Japan

<sup>¶</sup>Institute for Chemical Reaction Design and Discovery Hokkaido University Kita 21 Nishi 10, Kita-Ku, Sapporo, Hokkaido 001-0021, Japan

<sup>§</sup>PRESTO, Japan Science and Technology Agency (JST), 4-1-8 Honcho, Kawaguchi, Saitama 332-0012, Japan

E-mail: inagi@cap.mac.titech.ac.jp, shida-naoki-gz@ynu.ac.jp

#### **Table of Contents**

|                                                                       |            |
|-----------------------------------------------------------------------|------------|
| <i>Potential window analyses</i>                                      | <i>S2</i>  |
| <i>Conductivity of HFIP-containing electrolytes</i>                   | <i>S5</i>  |
| <i>Potential window of 0.3 M CsF/MeCN+HFIP (8/2 vol%) electrolyte</i> | <i>S6</i>  |
| <i>Single crystal X-ray diffraction analysis</i>                      | <i>S7</i>  |
| <i>NMR spectra of single crystals</i>                                 | <i>S8</i>  |
| <i>Electrochemical fluorination of triphenylmethane</i>               | <i>S17</i> |
| <i><sup>19</sup>F NMR spectra and GC-MS data for crude materials</i>  | <i>S18</i> |

## 1. Potential window analyses

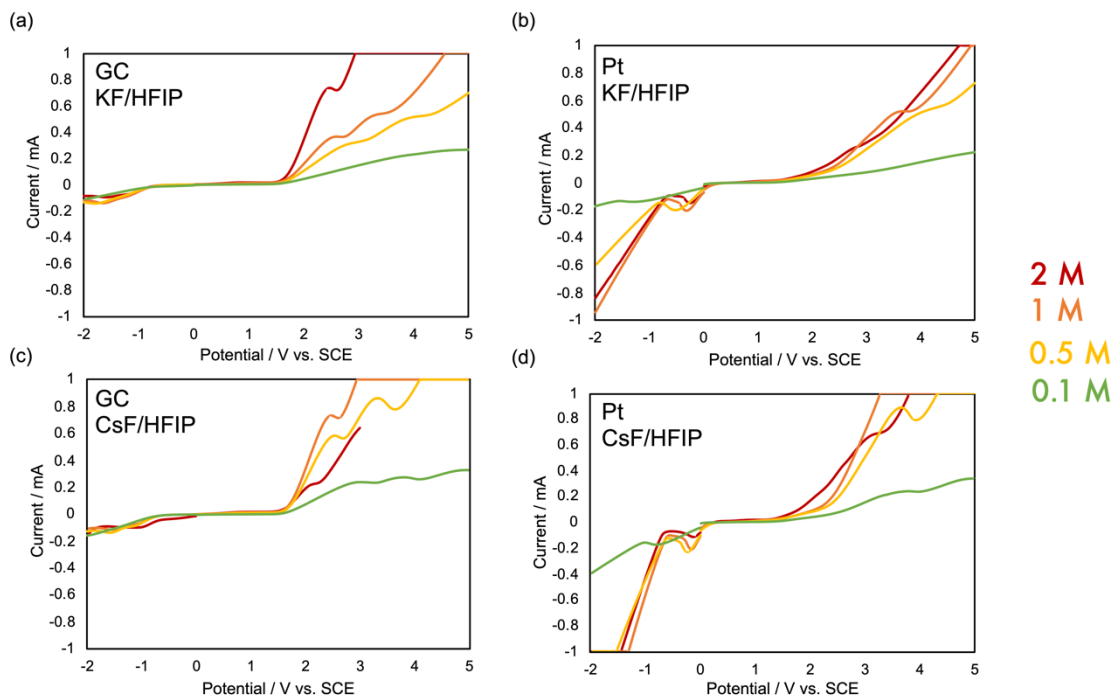

**Figure S1.** Linear sweep voltammograms of HFIP-based electrolytes using a GC disk or a Pt disk electrode as a working electrode. A Pt-plate counter electrode and a SCE were used as a counter electrode and a reference electrode, respectively. Voltammograms were recorded under ambient conditions at a scan rate of 100 mV/s. (a) KF/HFIP using GC. (b) KF/HFIP using Pt. (c) CsF/HFIP using GC. (d) CsF/HFIP using Pt.

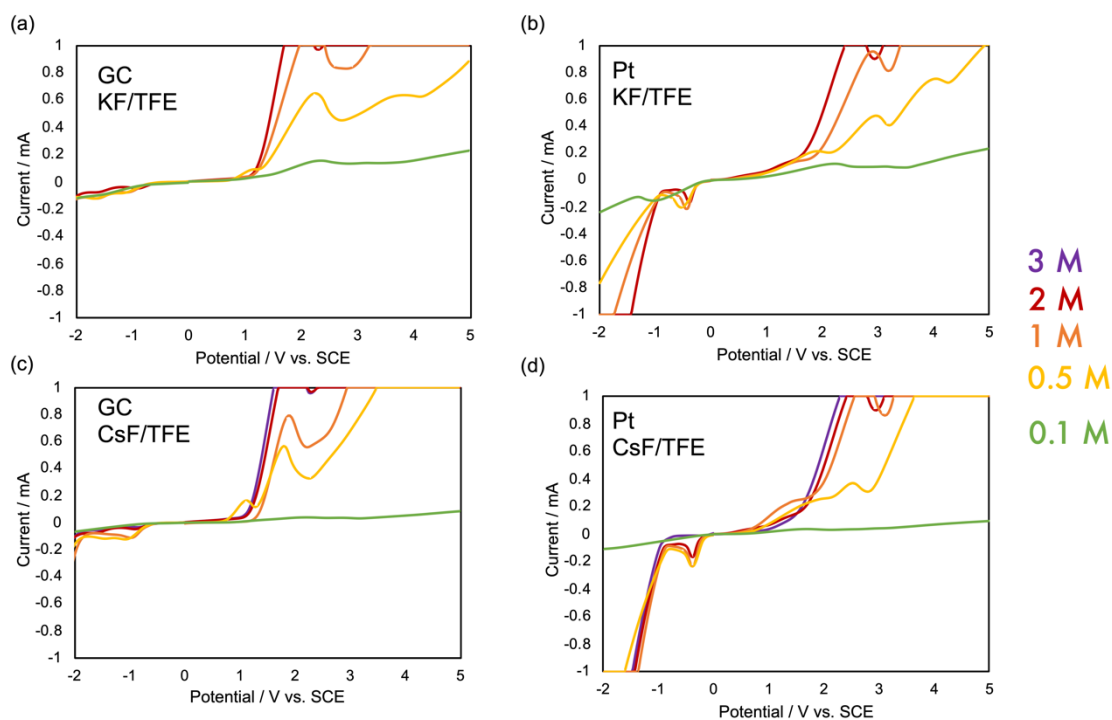

**Figure S2.** Linear sweep voltammograms of TFE-based electrolytes using a GC disk or a Pt disk electrode as a working electrode. A Pt-plate counter electrode and a SCE were used as a counter electrode and a reference electrode, respectively. Voltammograms were recorded under ambient conditions at a scan rate of 100 mV/s. (a) KF/TFE using GC. (b) KF/TFE using Pt. (c) CsF/TFE using GC. (d) CsF/TFE using Pt.

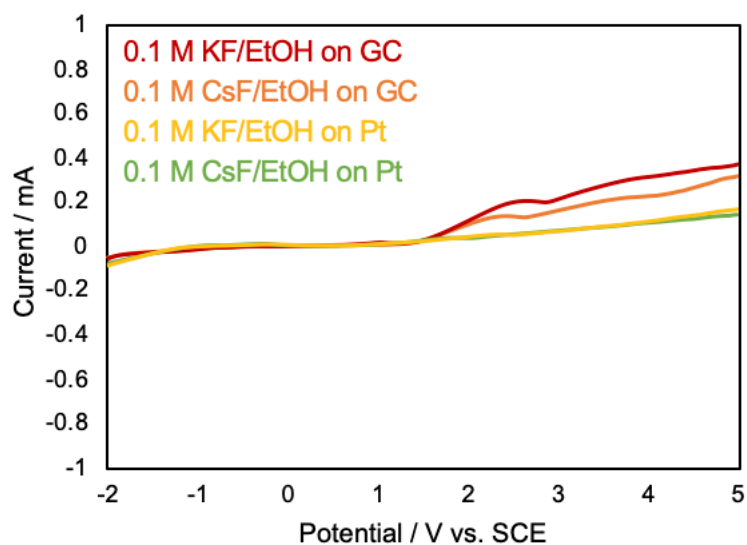

**Figure S3.** Linear sweep voltammograms of 0.1 M MF/EtOH (M = Cs, K) electrolytes using a GC disk or a Pt disk electrode as a working electrode. A Pt-plate counter electrode and a SCE were used as a counter electrode and a reference electrode, respectively. Voltammograms were recorded under ambient conditions at a scan rate of 100 mV/s.

## 2. Conductivity of HFIP-containing electrolytes

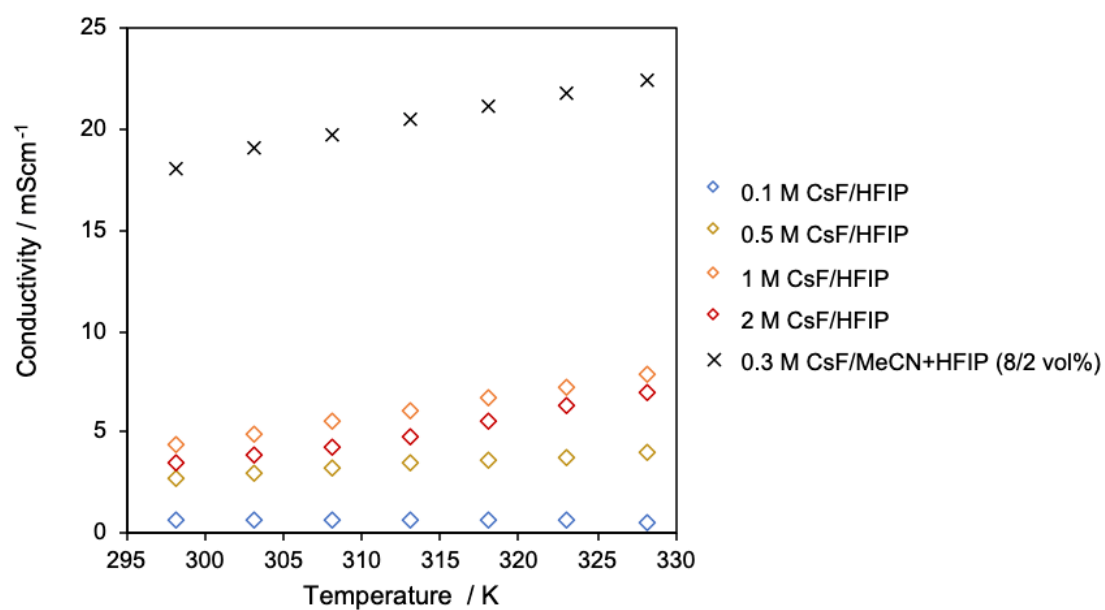

**Figure S4.** Conductivity of CsF/fluorinated alcohol and 0.3 M CsF/MeCN+HFIP (8/2 vol%) as a function of temperature.

### 3. Potential window of 0.3 M CsF/MeCN+HFIP (8/2 vol%) electrolyte

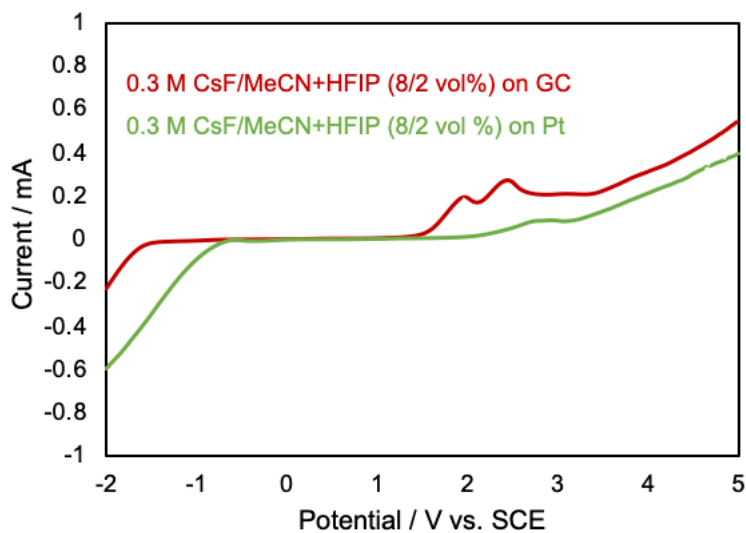

**Figure S5.** Linear sweep voltammograms of 0.3 M CsF/MeCN+HFIP (8/2) electrolytes using a GC disk or a Pt disk electrode as a working electrode. A Pt-plate counter electrode and a SCE were used as a counter electrode and a reference electrode, respectively. Voltammograms were recorded under ambient conditions at a scan rate of 100 mV/s.

#### 4. Single crystal X-ray diffraction analysis

**Table S1.** Crystallographic data of CsF-(HFIP)<sub>3</sub>, CsF-(TFE)<sub>2</sub> TBAF-(TFE)<sub>4</sub>.

| Crystal data                            | CsF-(HFIP) <sub>3</sub>                                        | CsF-(TFE) <sub>2</sub>                                        | TBAF-(HFIP) <sub>4</sub>                                        |
|-----------------------------------------|----------------------------------------------------------------|---------------------------------------------------------------|-----------------------------------------------------------------|
| CCDC                                    | 2067290                                                        | 2067291                                                       | 2067292                                                         |
| Empirical Formula                       | C <sub>9</sub> H <sub>6</sub> CsF <sub>19</sub> O <sub>3</sub> | C <sub>4</sub> H <sub>6</sub> CsF <sub>7</sub> O <sub>2</sub> | C <sub>24</sub> H <sub>48</sub> F <sub>13</sub> NO <sub>4</sub> |
| Formula Weight                          | 656.05                                                         | 352.00                                                        | 661.63                                                          |
| h, k, lmax                              | 11, 24, 13                                                     | 11, 25, 6                                                     | 23, 23, 6                                                       |
| Crystal System                          | orthorhombic                                                   | orthorhombic                                                  | tetragonal                                                      |
| Space Group                             | P n m a                                                        | P 1 2 <sub>1</sub> /n 1                                       | I 41/a                                                          |
| a, Å                                    | 9.4397(9)                                                      | 9.4565(8)                                                     | 19.2444(10)                                                     |
| b, Å                                    | 19.928(3)                                                      | 20.9063(19)                                                   | 19.2444(10)                                                     |
| c, Å                                    | 10.5504(12)                                                    | 9.7266(10)                                                    | 9.4489(7)                                                       |
| α, deg                                  | 90                                                             | 90                                                            | 90                                                              |
| β, deg                                  | 90                                                             | 90                                                            | 90                                                              |
| γ, deg                                  | 90                                                             | 90                                                            | 90                                                              |
| Volume, Å <sup>3</sup>                  | 1984.7(4)                                                      | 1923.0(3)                                                     | 3499.4(4)                                                       |
| D <sub>calcd</sub> , g cm <sup>-3</sup> | 2.196                                                          | 2.432                                                         | 1.256                                                           |
| Z                                       | 4                                                              | 8                                                             | 4                                                               |
| F(000)                                  | 1240                                                           | 1312                                                          | 1392                                                            |
| Data Collection                         | Data Collection                                                | Data Collection                                               | Data Collection                                                 |
| Temperature, K                          | 93(2)                                                          | 93(2)                                                         | 293(2)                                                          |
| 2θmax, deg                              | 71.9850                                                        | 76.4490                                                       | 73.2350                                                         |
| Tmin/Tmax                               | 0.52422 / 1.0000                                               | 0.03095 / 1.0000                                              | 0.68094 / 1.0000                                                |
| Refinement                              | Refinement                                                     | Refinement                                                    | Refinement                                                      |
| No. of Observed Data                    | 1994                                                           | 1971                                                          | 1741                                                            |
| No. of Parameters                       | 158                                                            | 139                                                           | 105                                                             |
| R1 <sup>a</sup> , wR2 <sup>b</sup>      | 0.1247, 0.3449                                                 | 0.1455, 0.3310                                                | 0.0652, 0.1829                                                  |
| Goodness of Fit Indicator               | 1.246                                                          | 1.248                                                         | 1.120                                                           |

$$^aR1 = \sum ||Fo| - |Fc|| / \sum |Fo| \quad ^bwR2 = [ \sum w ((Fo^2 - Fc^2)^2 / \sum w (Fo^2)^2 )^{1/2} \quad w = [ \sigma^2(Fo^2) ]^{-1}$$

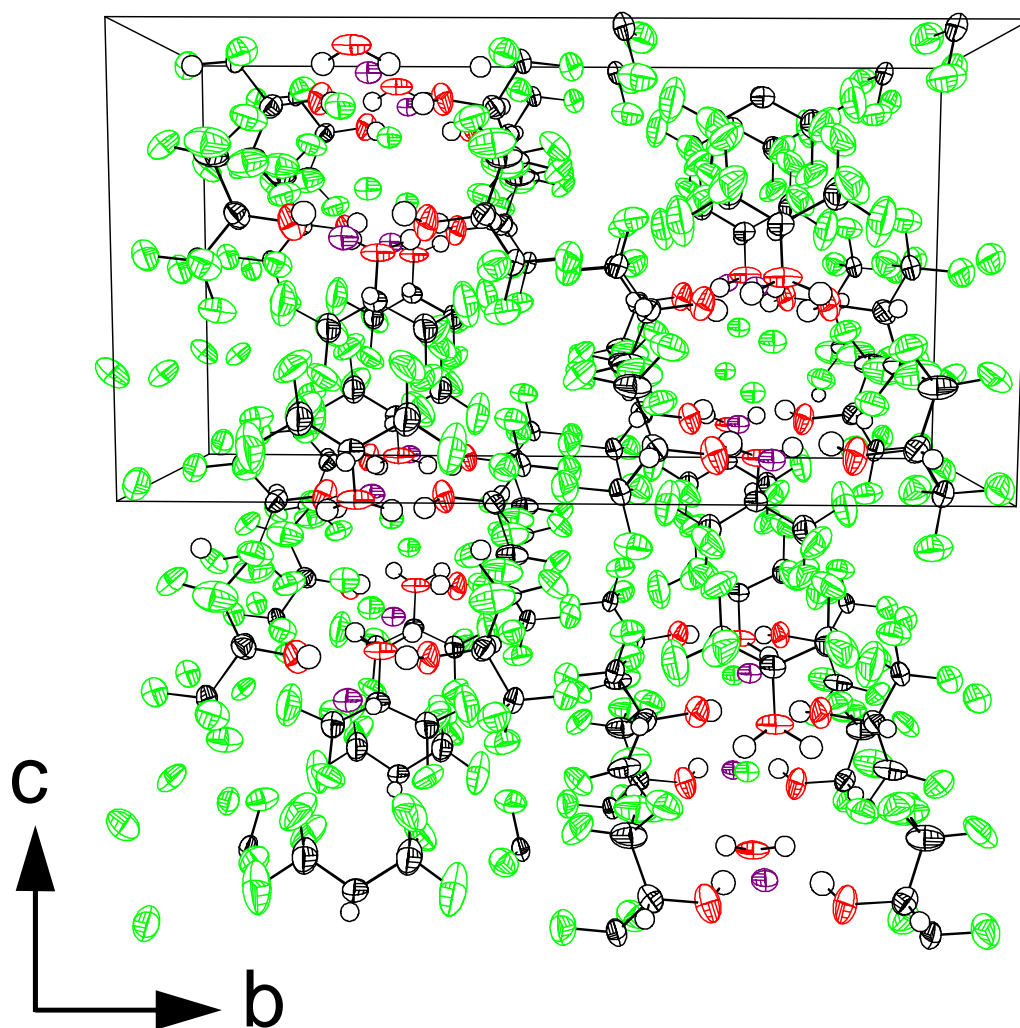

**Figure S6.** Packing diagram for CsF-(HFIP)<sub>3</sub> with anisotropic displacement ellipsoids shown at the 50% probability level. Labelling of atoms is as follows; black: carbon, red: oxygen, green: fluorine, purple: cesium, white: hydrogen.



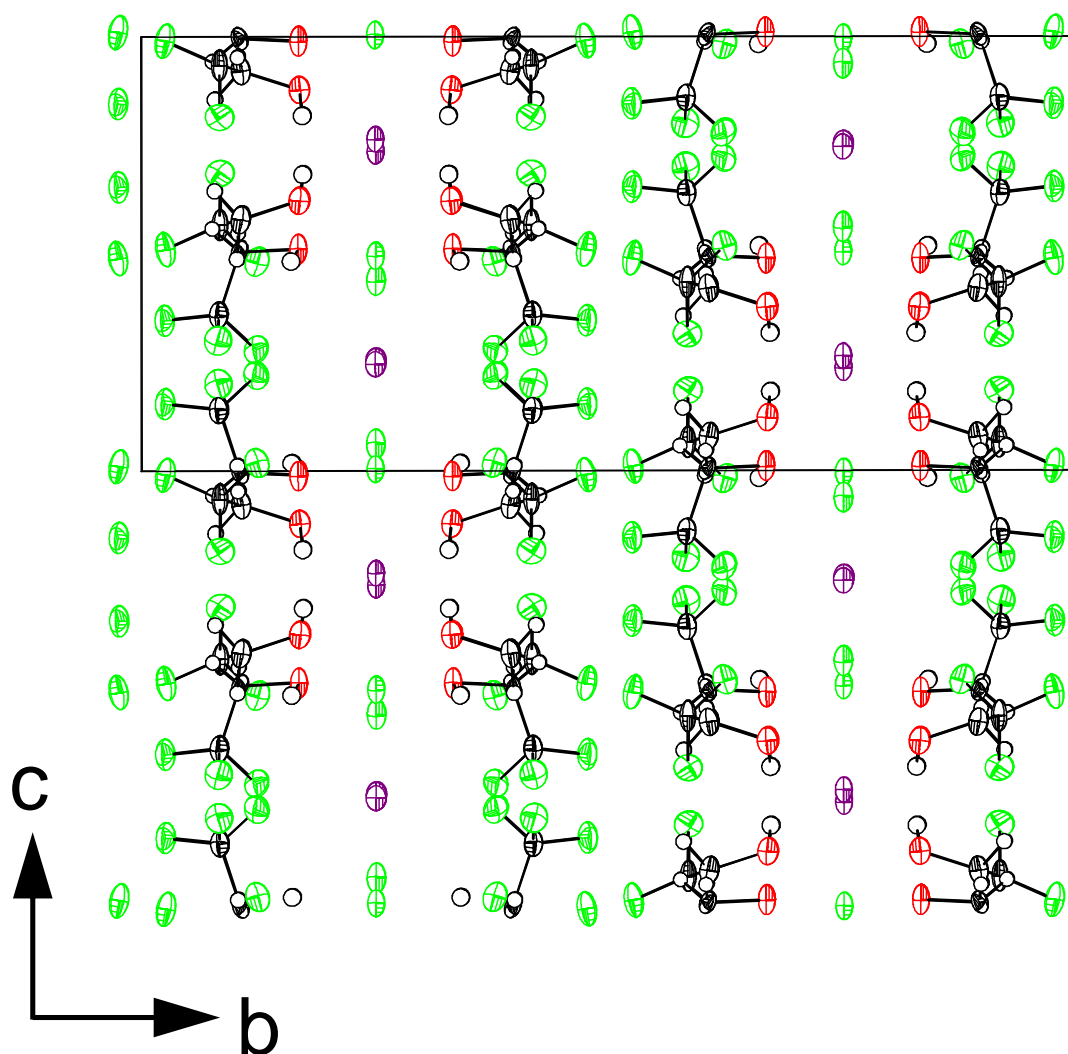

**Figure S7.** Packing diagram for CsF-(TFE)<sub>2</sub> with anisotropic displacement ellipsoids shown at the 50% probability level. Labelling of atoms is as follows; black: carbon, red: oxygen, green: fluorine, purple: cesium, white: hydrogen.

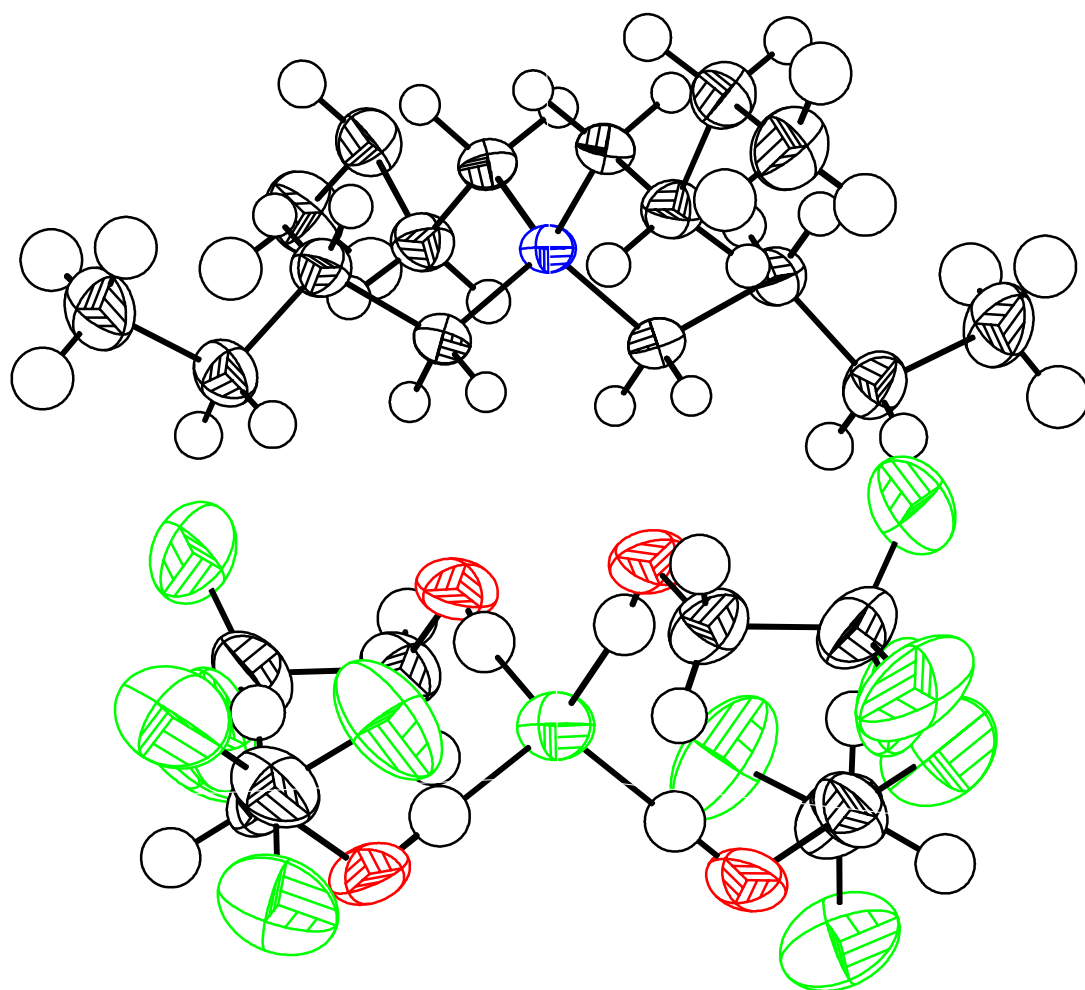

**Figure S8.** Solid-state structure of TBAF-(TFE)<sub>4</sub> with anisotropic displacement ellipsoids shown at the 50% probability level. Labelling of atoms is as follows; black: carbon, red: oxygen, green: fluorine, blue: nitrogen, white: hydrogen.

## 5. NMR spectra of single crystals

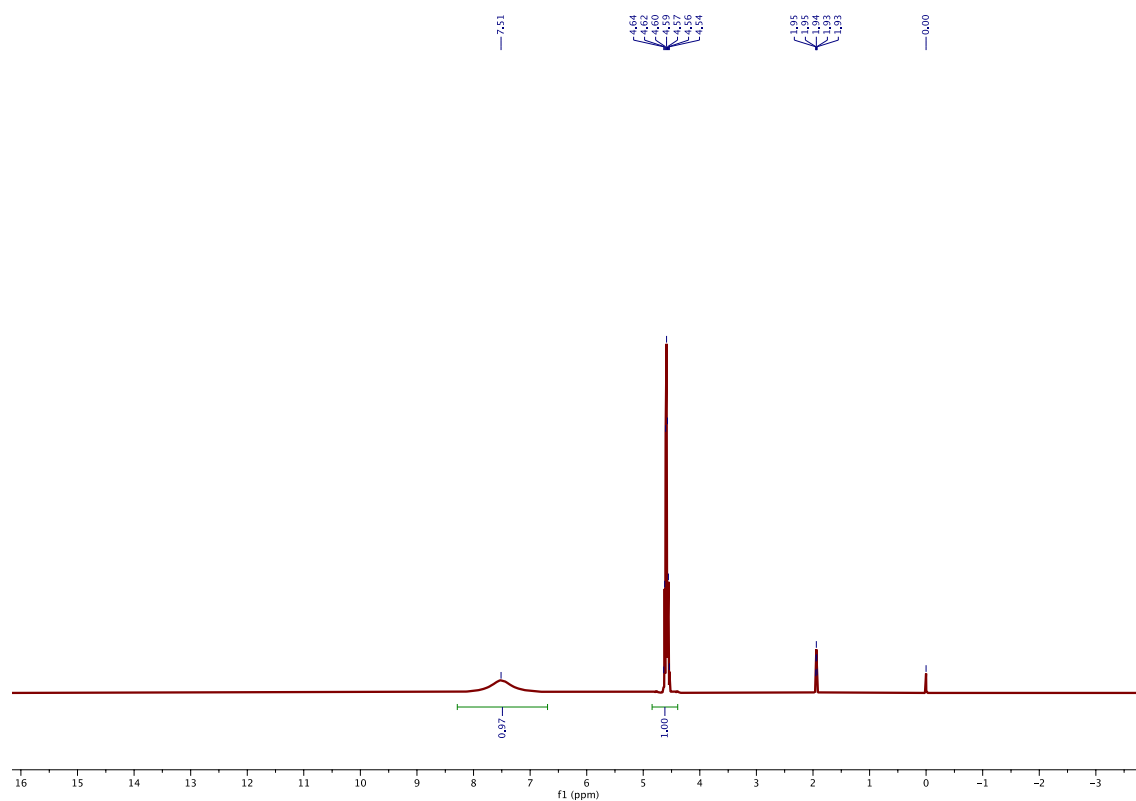

**Figure S9.**  $^1\text{H}$  NMR spectrum (400.13 MHz,  $\text{CD}_3\text{CN}$ , 25 °C) of  $\text{CsF}-(\text{HFIP})_3$ .

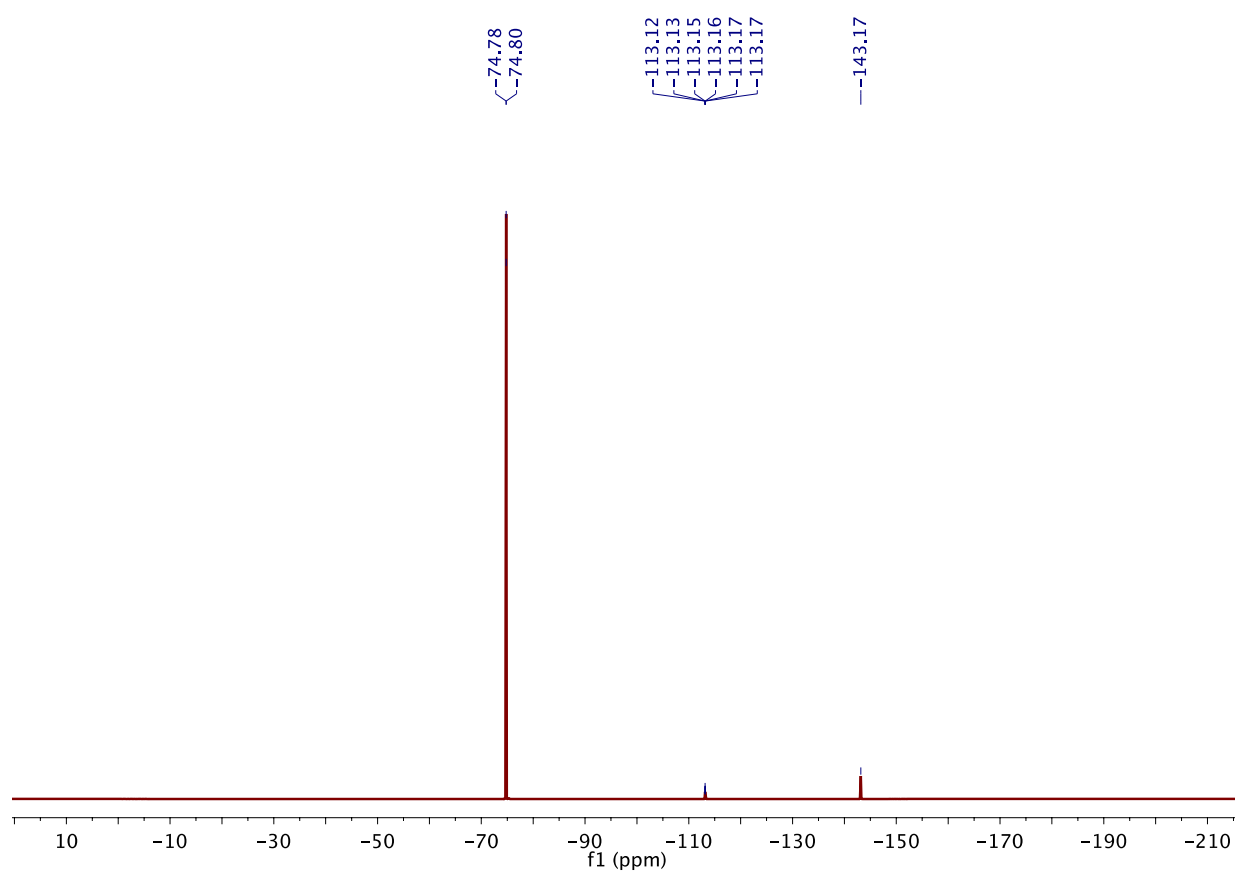

**Figure S10.**  $^{19}\text{F}$  NMR spectrum (376.31 MHz,  $\text{CD}_3\text{CN}$ , 25 °C) of  $\text{CsF}-(\text{HFIP})_3$ .

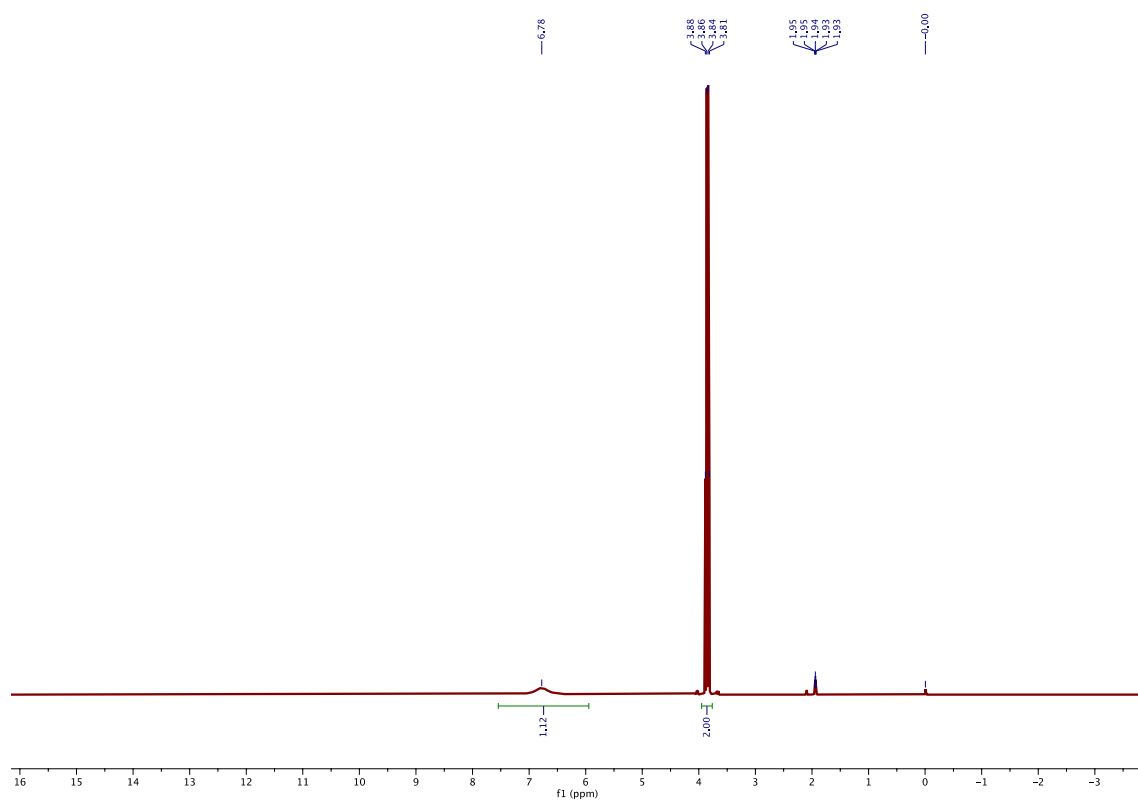

**Figure S11.**  $^1\text{H}$  NMR spectrum (400.13 MHz,  $\text{CD}_3\text{CN}$ , 25  $^\circ\text{C}$ ) of  $\text{CsF}-(\text{TFE})_2$ .

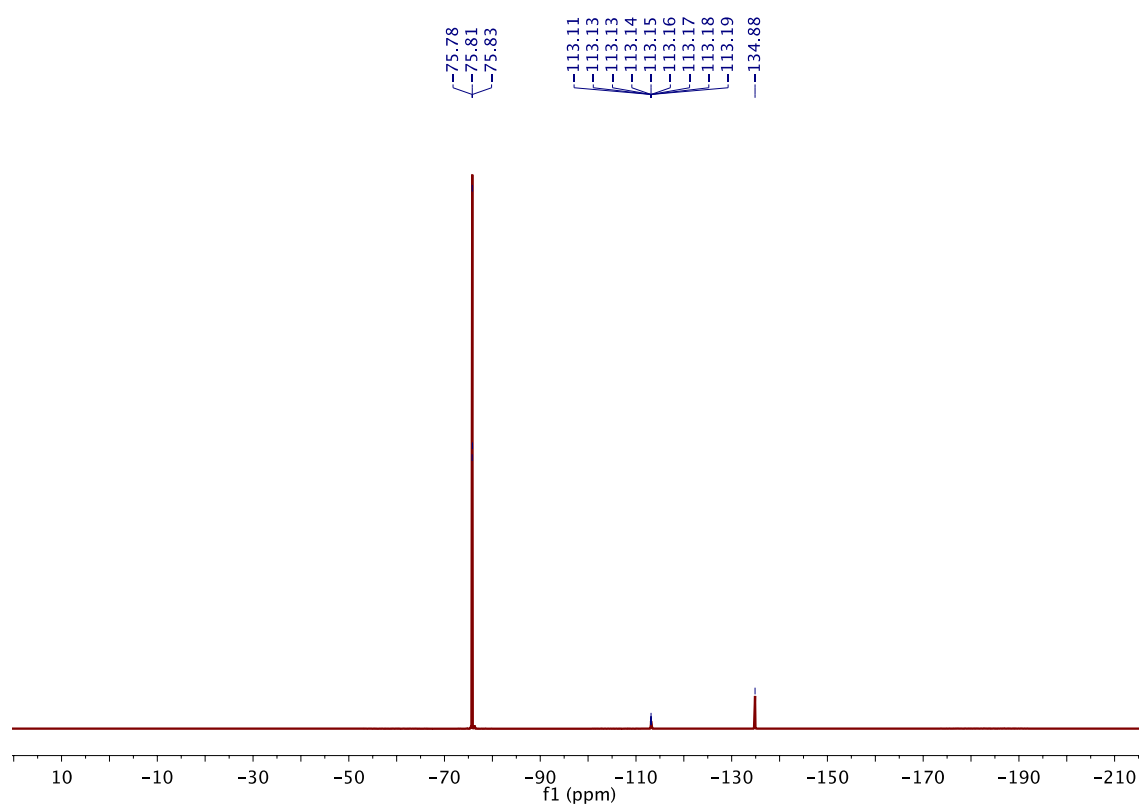

**Figure S12.**  $^{19}\text{F}$  NMR spectrum (376.31 MHz,  $\text{CD}_3\text{CN}$ , 25 °C) of  $\text{CsF}-(\text{TFE})_2$ .

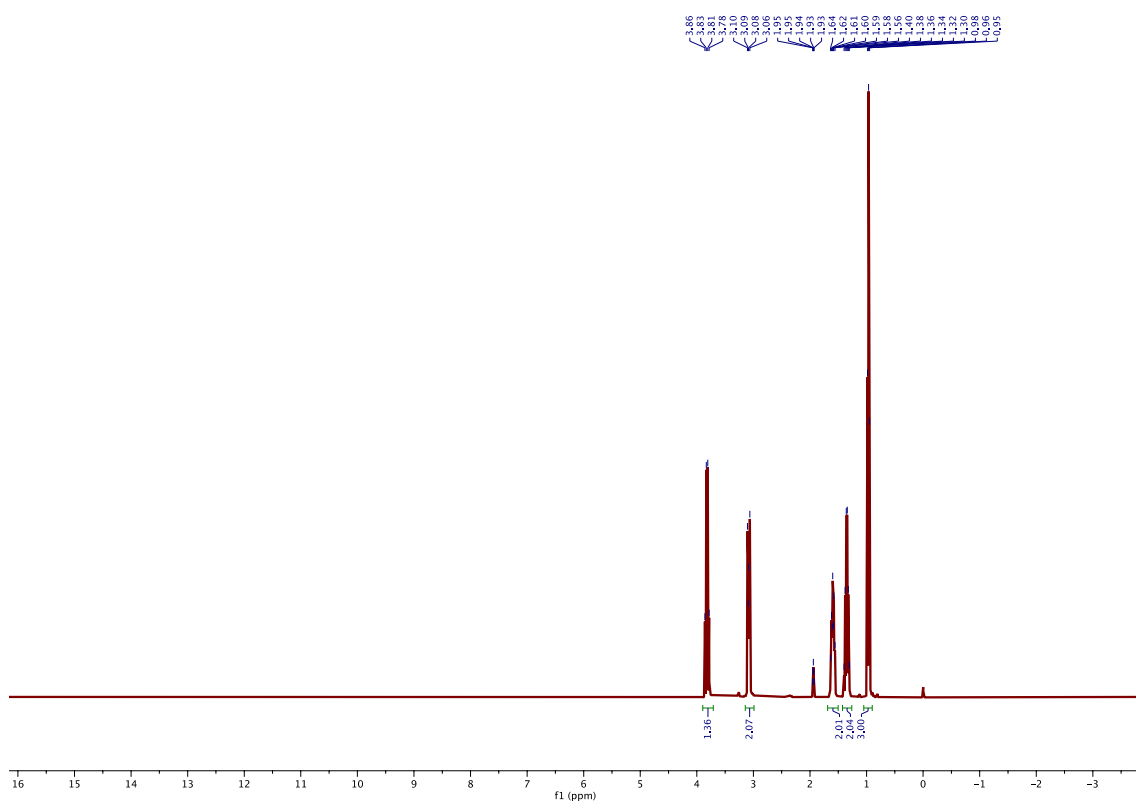

**Figure S13.** <sup>1</sup>H NMR spectrum (400.13 MHz, CD<sub>3</sub>CN, 25 °C) of TBAF-(TFE)<sub>4</sub>.

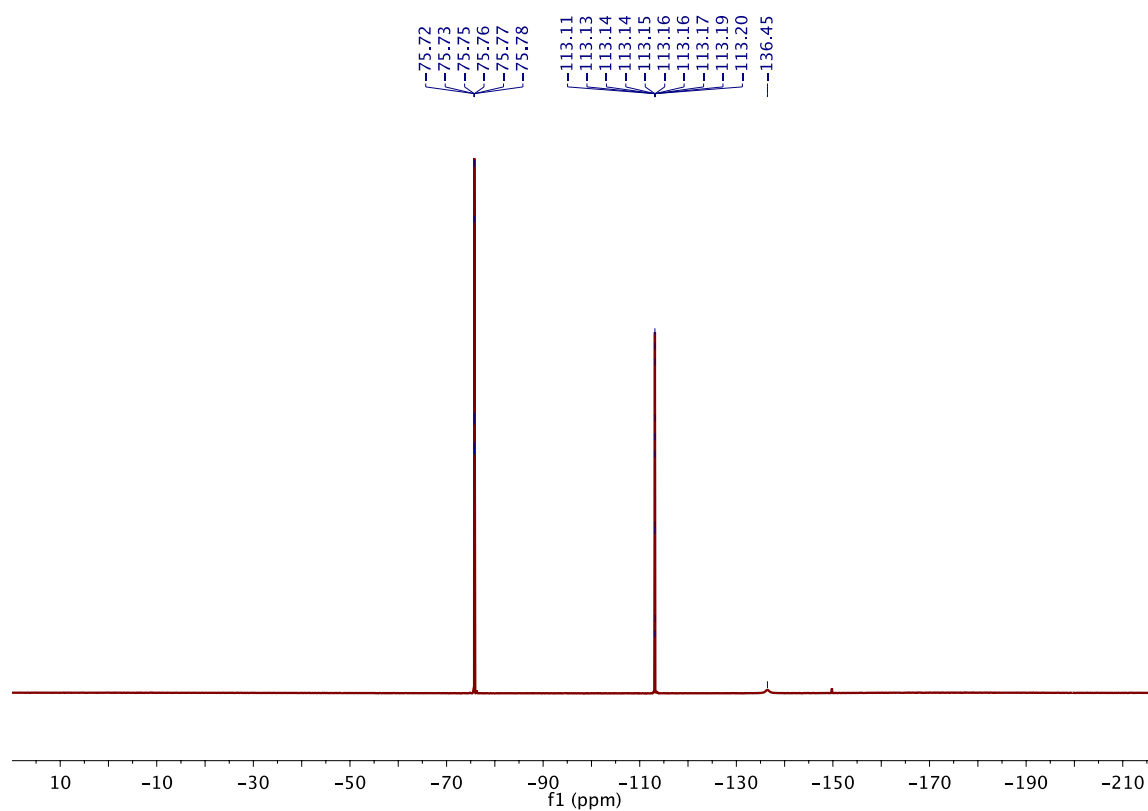

**Figure S14.**  $^{19}\text{F}$  NMR spectrum (376.31 MHz,  $\text{CD}_3\text{CN}$ , 25 °C) of  $\text{TBAF}-(\text{TFE})_4$ .



## 6. Electrochemical fluorination of triphenylmethane

**Table S2.** Optimization of reaction conditions for the electrochemical fluorination of triphenylmethane using MF/fluorinated alcohol electrolyte.

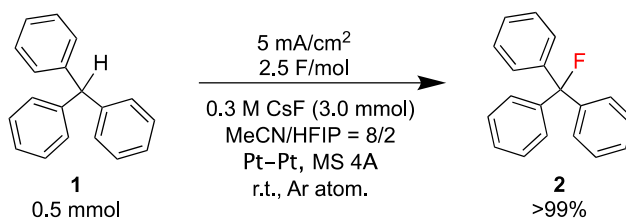

| Entry | Deviation from optimal conditions    | Yield [%] |
|-------|--------------------------------------|-----------|
| 1     | none                                 | >99%      |
| 2     | KF instead of CsF                    | >99%      |
| 3     | 2.0 F/mol instead of 2.5 F/mol       | 83%       |
| 4     | 0.1 M CsF instead of 0.3 M CsF       | 55%       |
| 5     | HFIP only instead of MeCN/HFIP (8/2) | n.d.      |
| 6     | TFE (2 mL) instead of HFIP (2 mL)    | 65%       |
| 7     | No MS4A                              | 30%       |
| 8     | Under air                            | 66%       |
| 9     | GC anode instead of Pt               | 28%       |
| 10    | 10 mL MeCN with 600 $\mu$ L of HFIP  | 84%       |

## 7. $^{19}\text{F}$ NMR spectra and GC-MS data for crude materials

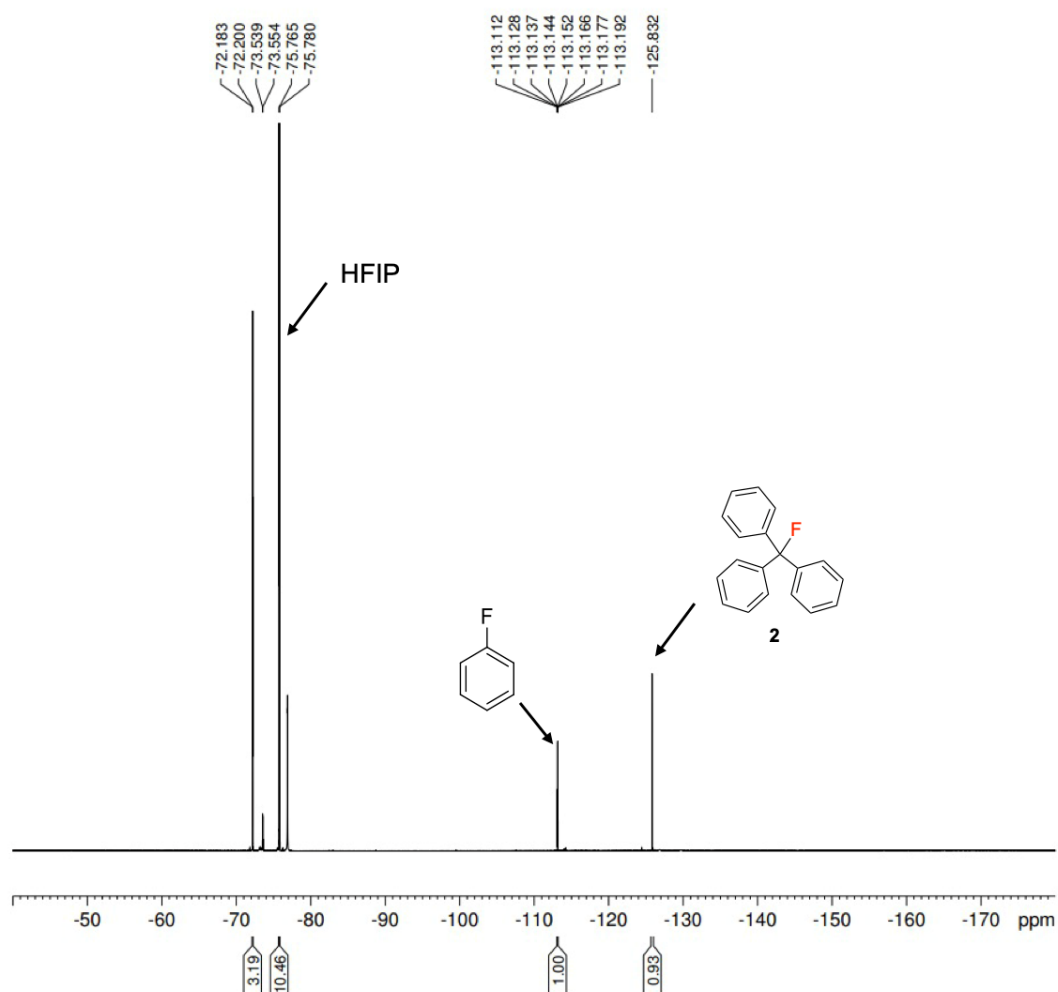

**Figure S15.**  $^{19}\text{F}$  NMR spectrum (376.31 MHz,  $\text{CD}_3\text{CN}$ , 25 °C) of crude reaction mixture of **2**.

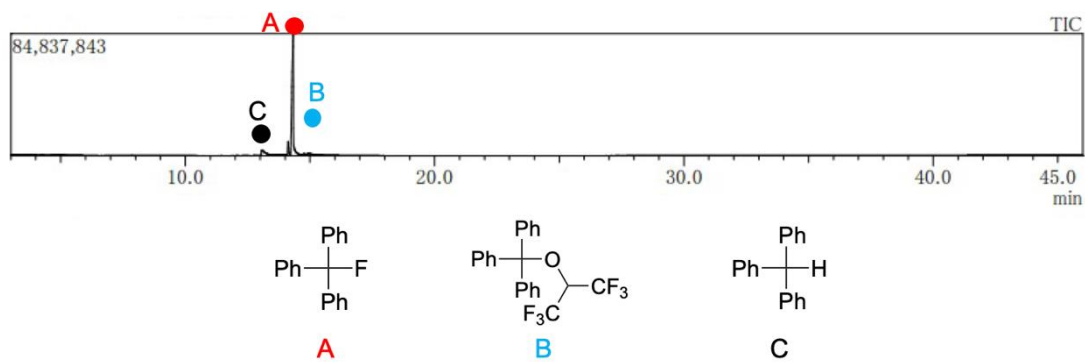

**Figure S16.** GC-MS of the crude reaction mixture of **2**.

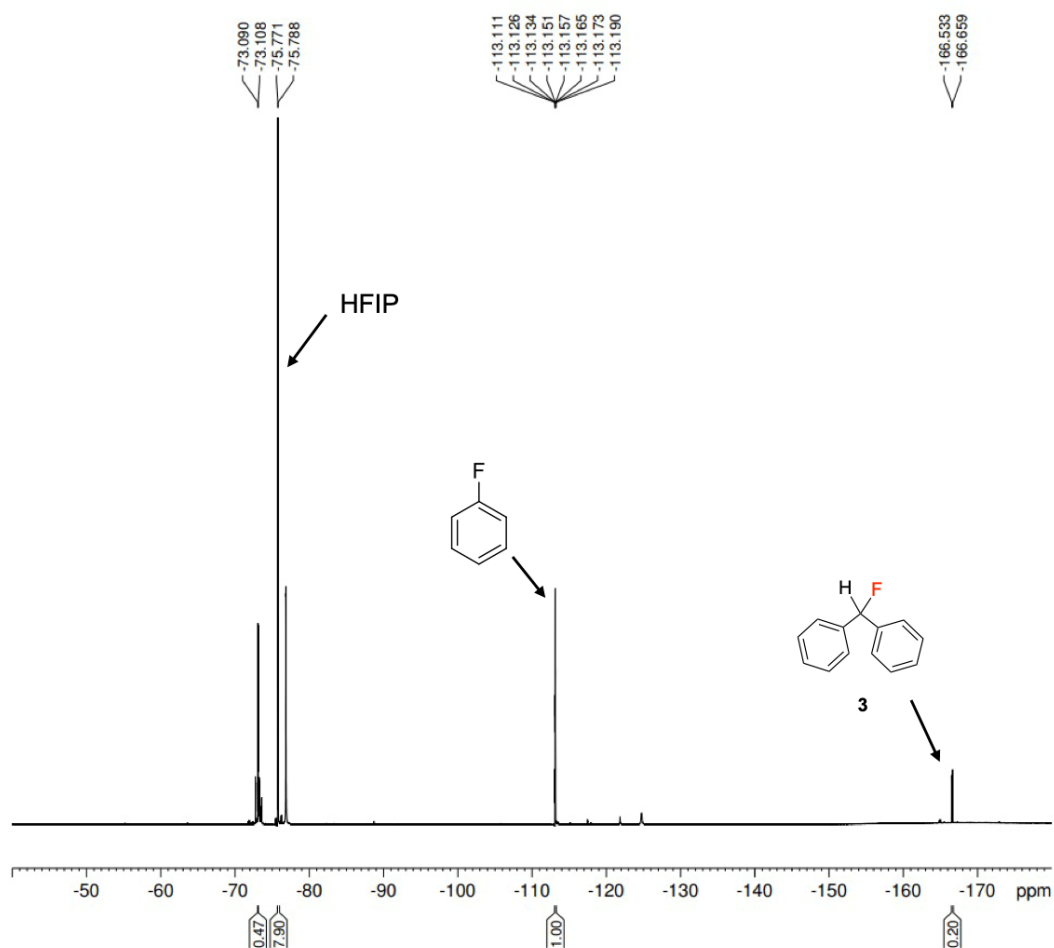

**Figure S17.** <sup>19</sup>F NMR spectrum (376.31 MHz, CD<sub>3</sub>CN, 25 °C) of crude reaction mixture of **3**.

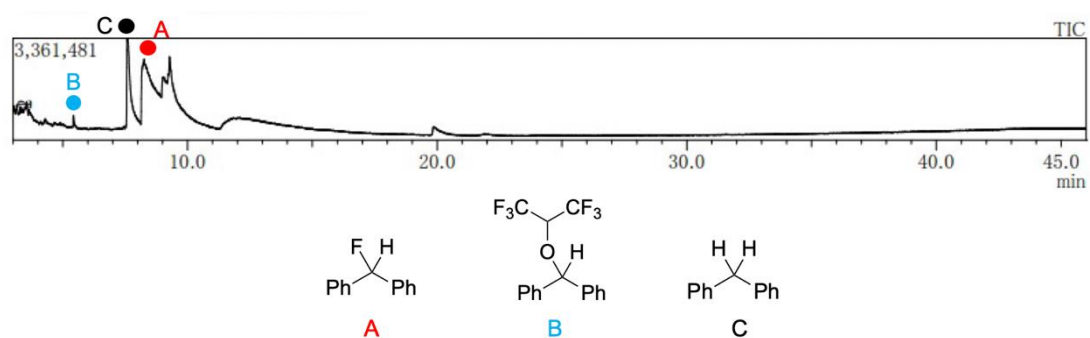

**Figure S18.** GC-MS of the crude reaction mixture of **3**.

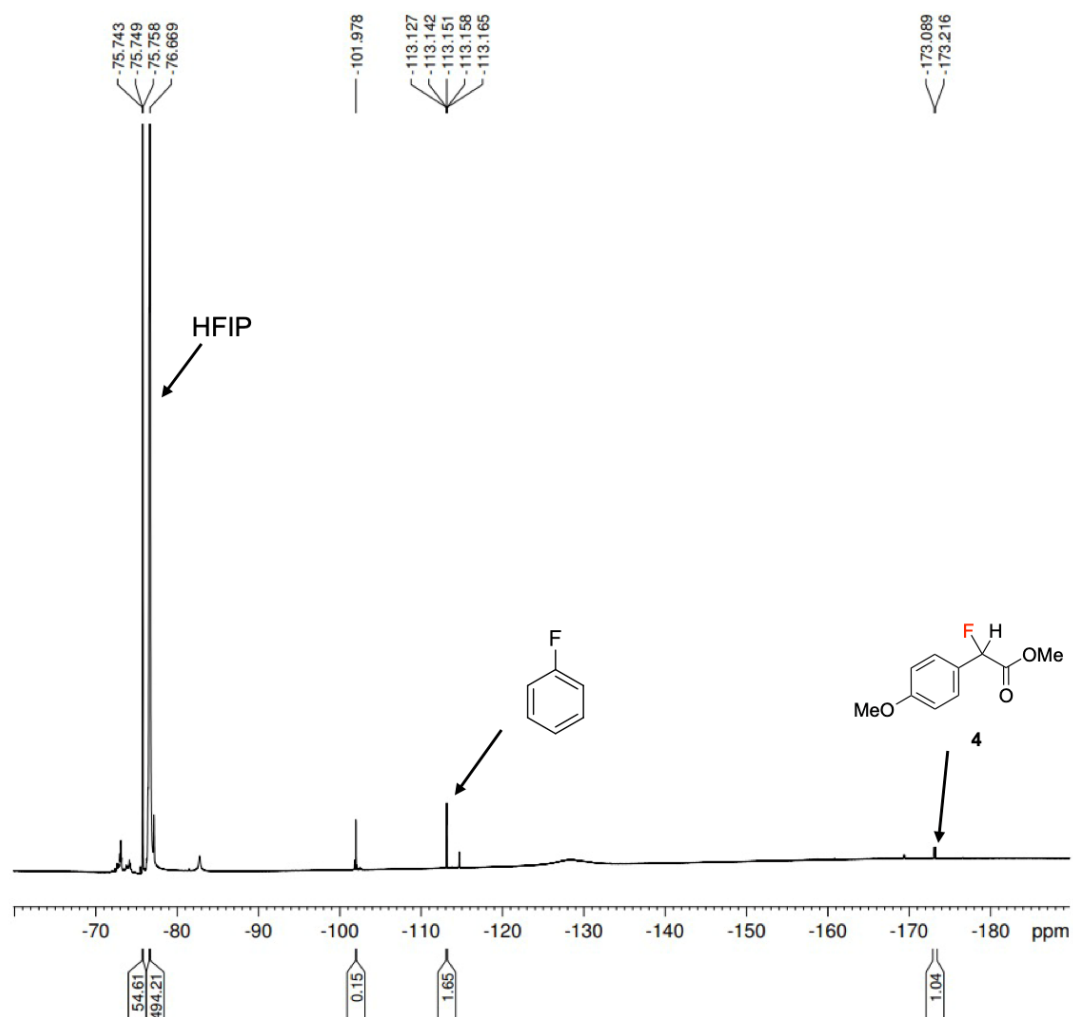

**Figure S19.**  $^{19}\text{F}$  NMR spectrum (376.31 MHz,  $\text{CD}_3\text{CN}$ , 25  $^\circ\text{C}$ ) of crude reaction mixture of **4**.

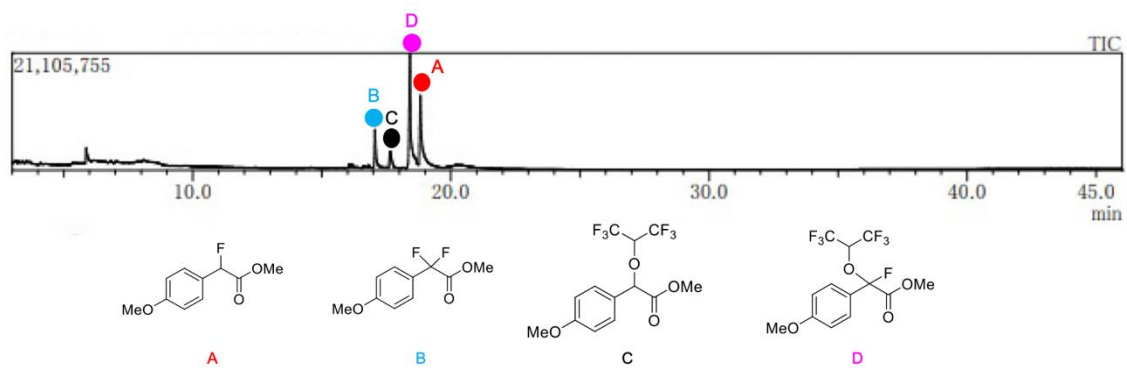

**Figure S20.** GC-MS of the crude reaction mixture of **4**.

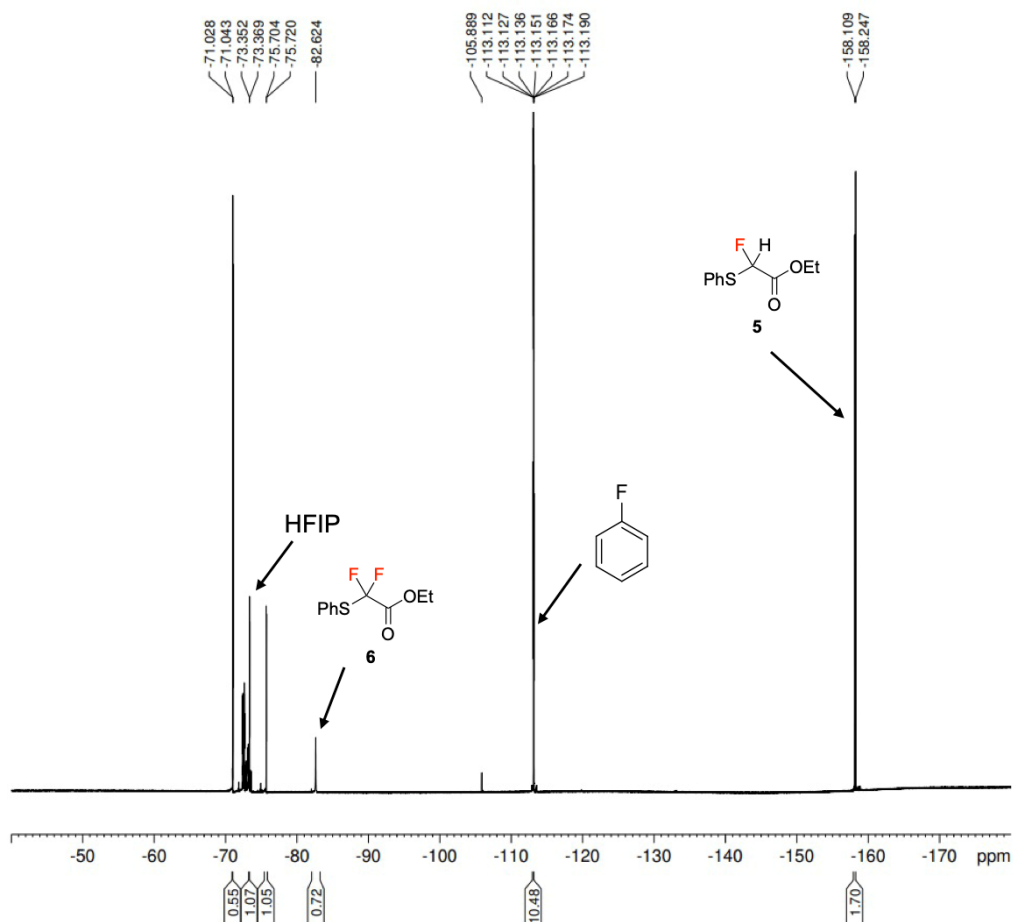

**Figure S21.** <sup>19</sup>F NMR spectrum (376.31 MHz, CD<sub>3</sub>CN, 25 °C) of crude reaction mixture of **5** and **6**.

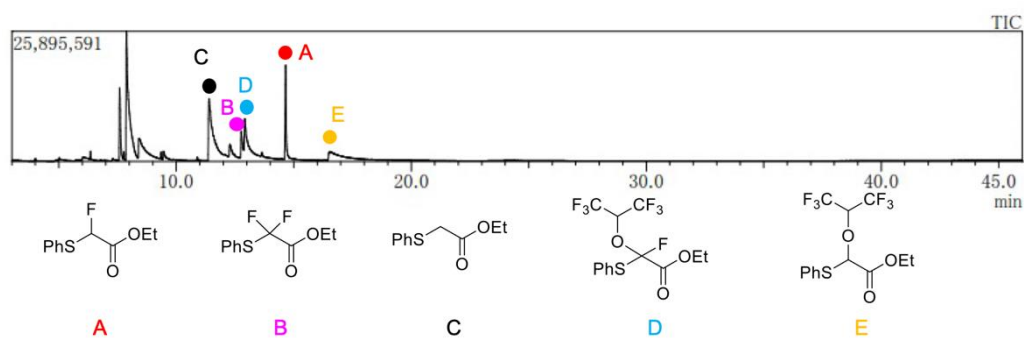

**Figure S22.** GC-MS of the crude reaction mixture of **5** and **6**.

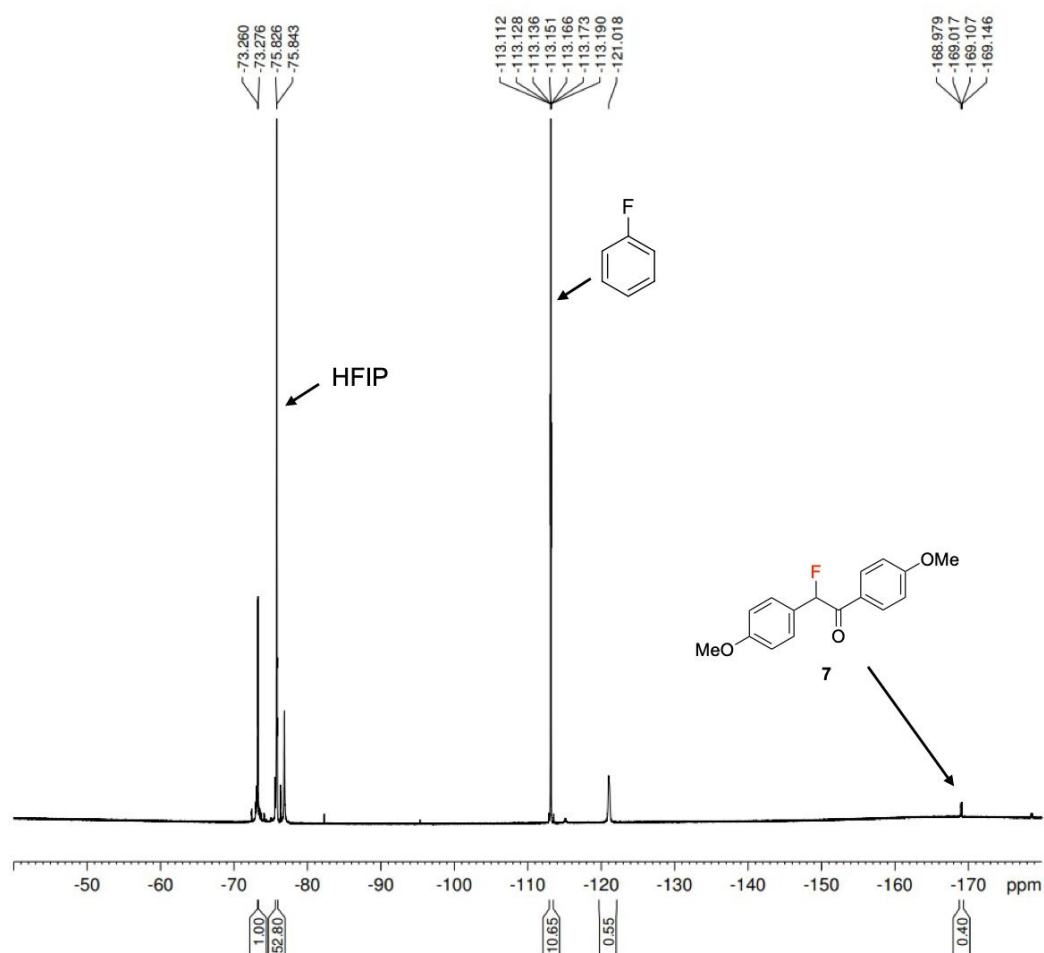

**Figure S23.** <sup>19</sup>F NMR spectrum (376.31 MHz, CD<sub>3</sub>CN, 25 °C) of crude reaction mixture of **7**.

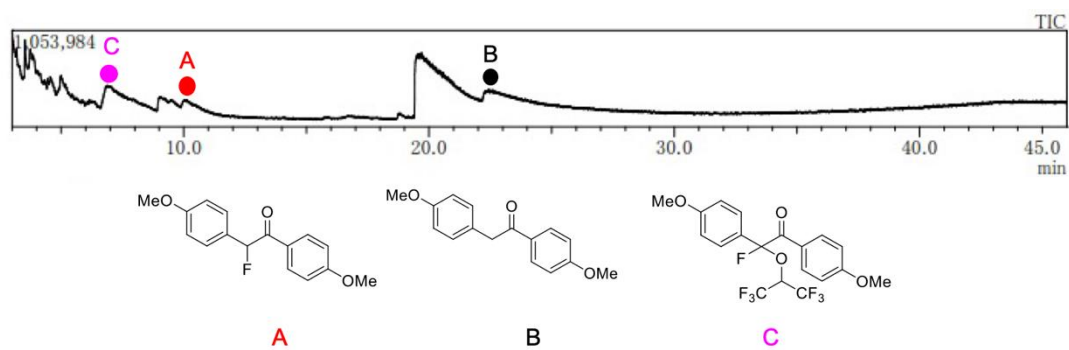

**Figure S24.** GC-MS of the crude reaction mixture of **7**.

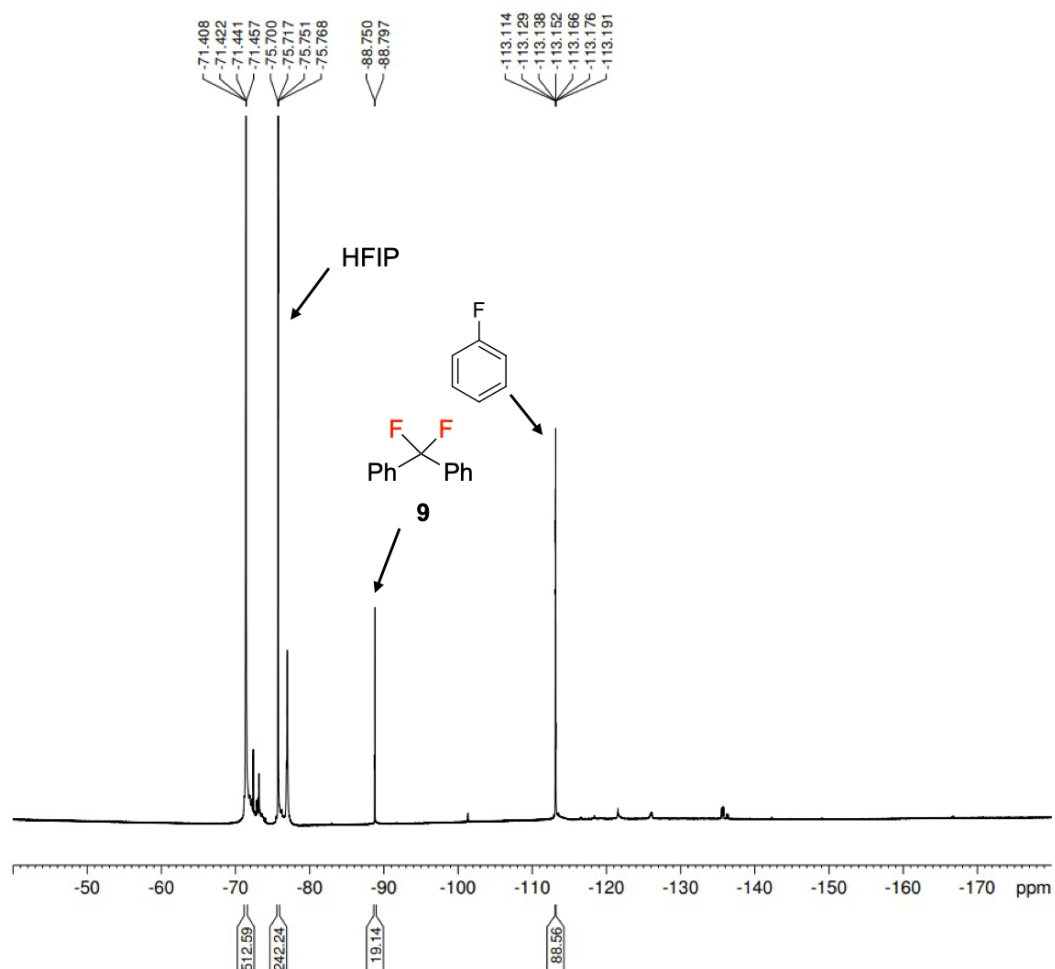

**Figure S25.**  $^{19}\text{F}$  NMR spectrum (376.31 MHz,  $\text{CD}_3\text{CN}$ , 25 °C) of crude material containing **9**.

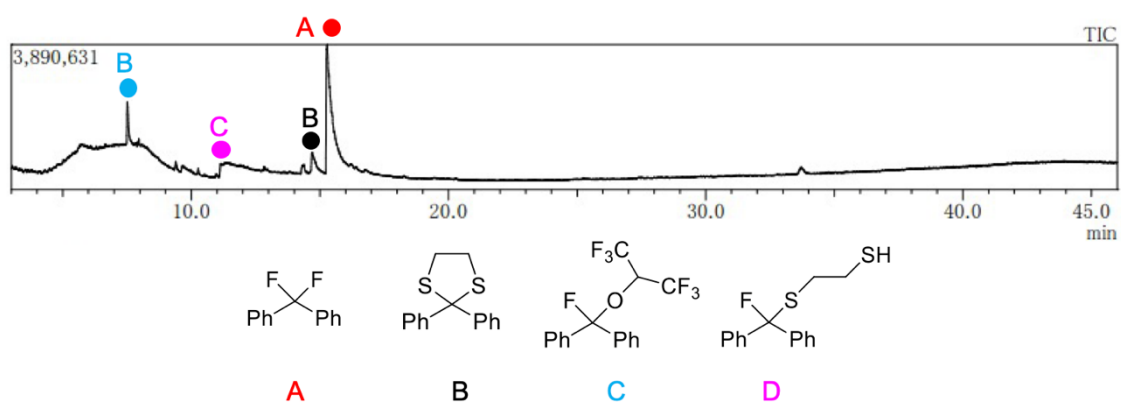

**Figure S26.** GC-MS of the crude reaction mixture of **9**.
